# Supplementary material
Source: Springer Nature journal article supplement (https://www.springermedizin.de/resource/supplementary/12893_2009_134_MOESM2_ESM.pdf/9513054)

F

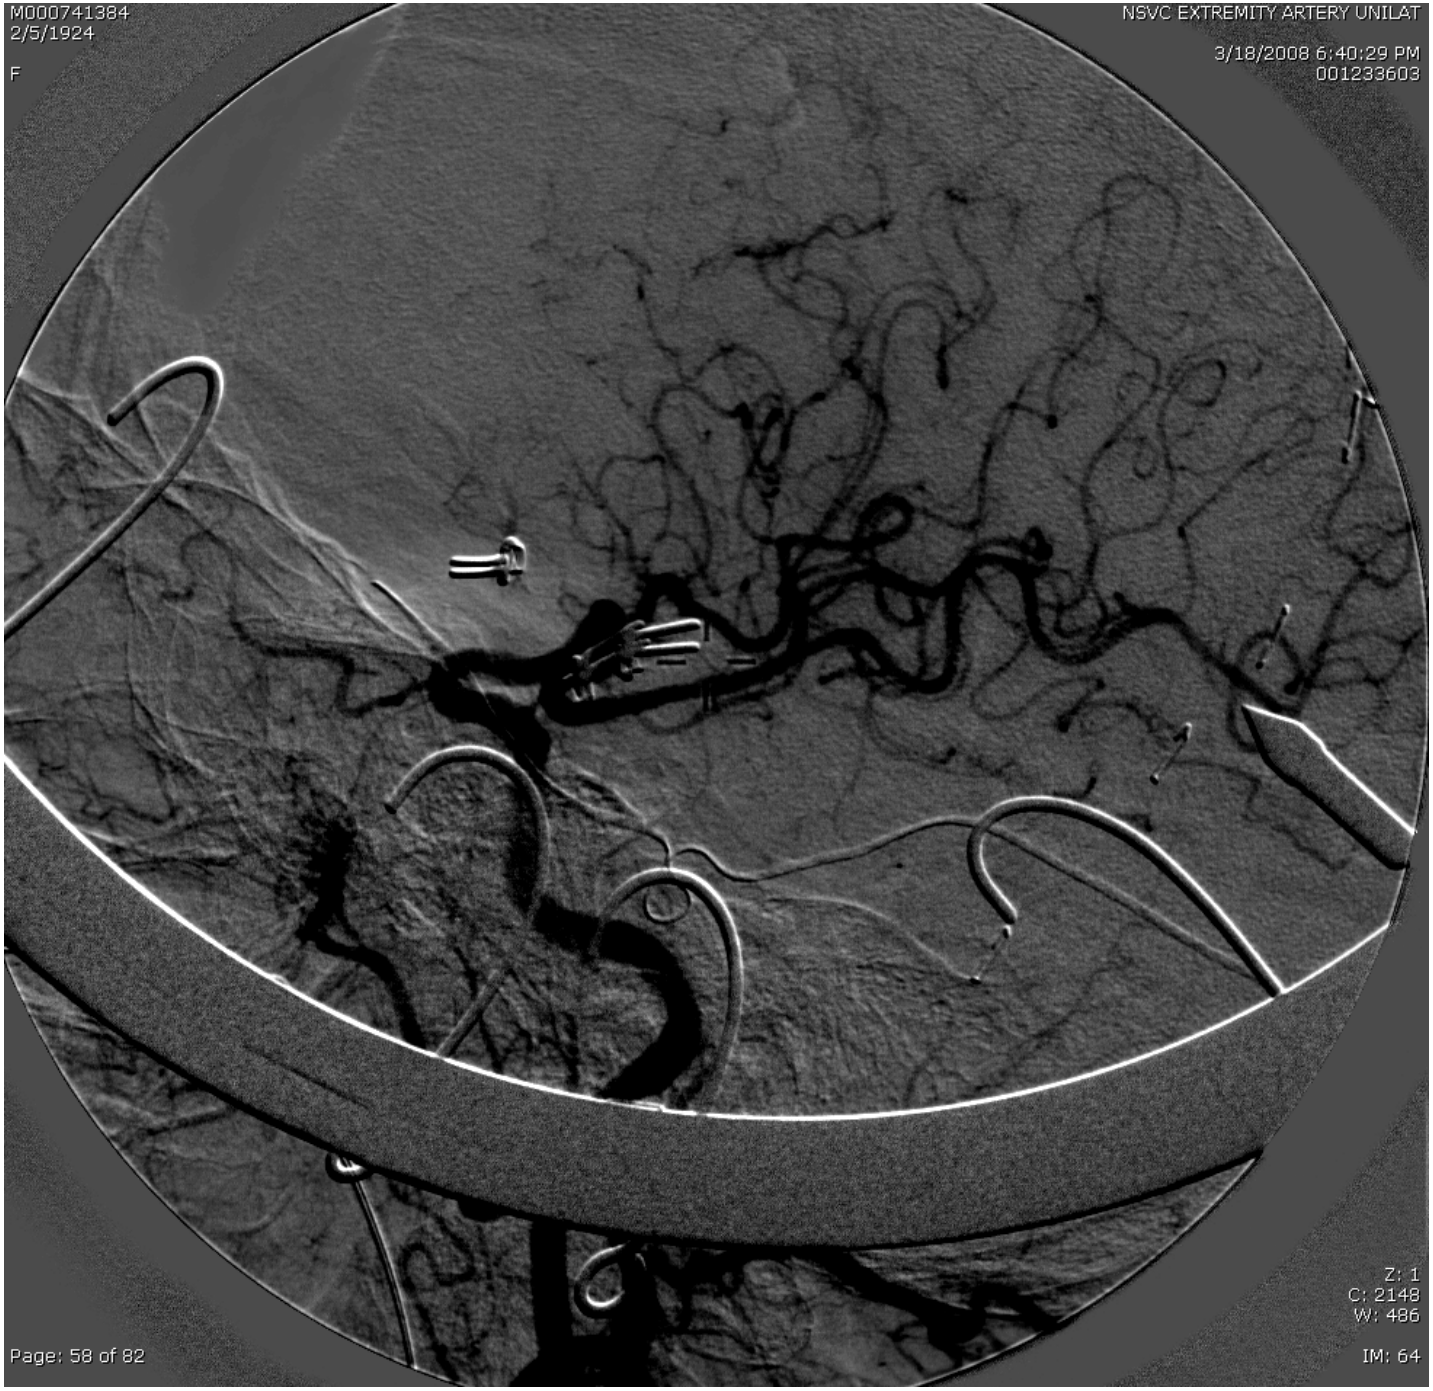

Z: 1  
C: 2148  
W: 486

Supplement: MOESM2 [file 9513054]
